# Supplementary material for: An ultrasensitive electrochemiluminescence aptasensor for the detection of diethylstilbestrol based on the enhancing mechanism of the metal–organic framework NH2-MIL-125(Ti) in a 3,4,9,10-perylenetetracarboxylic acid/K2S2O8 system
Source: Royal Society of Chemistry journal article supplement (doi:10.1039/d0an00212g), 2020-01-01
Supplement: d0an00212g1.pdf [file d0an00212g1.pdf]

## Supporting Information

### **Ultrasensitive electrochemiluminescence aptasensor for the detection of diethylstilbestrol based on an enhancing mechanism of the metal-organic frameworks NH<sub>2</sub>-MIL-125 (Ti) in 3, 4, 9, 10-perylenetetracar-boxylic acid/K<sub>2</sub>S<sub>2</sub>O<sub>8</sub> system**

Jingxian Li,<sup>a</sup> Xueling Shan,<sup>a</sup> Ding Jiang,<sup>a</sup> Zhidong Chen\*<sup>a</sup>

*<sup>a</sup>Jiangsu Key Laboratory of Advanced Catalytic Materials and Technology, School of  
Petrochemical Engineering, Changzhou University, Changzhou 213164, China.*

*<sup>b</sup>Advanced Catalysis and Green Manufacturing Collaborative Innovation Center,  
Changzhou University, Changzhou 213164, China.*

Corresponding author E-mail: \*Z. Chen: zdchen@cczu.edu.cn

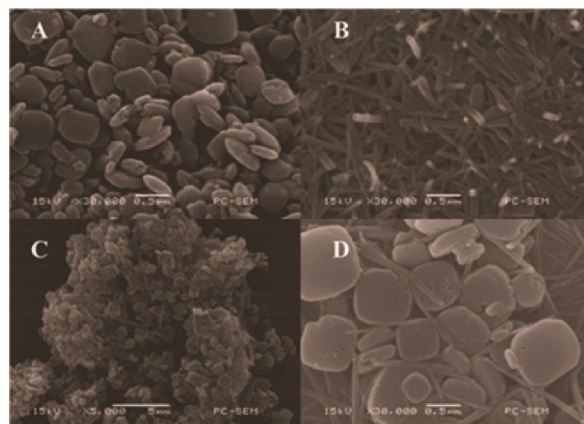

**Figure S1.** SEM images of (A) NH<sub>2</sub>-MIL-125, (B) PTCA and (C, D) PTCA/NH<sub>2</sub>-MIL-125.

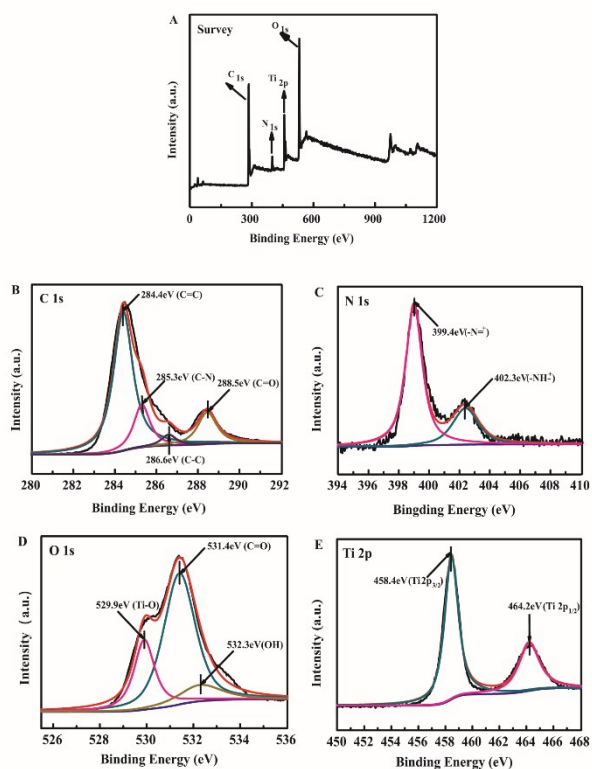

**Figure S2.** XPS spectra of PTCA/ $\text{NH}_2$ -MIL-125 sample (A) Survey of the sample, (B) C 1s, (C) N 1s, (D) O 1s, (E) Ti 2p.

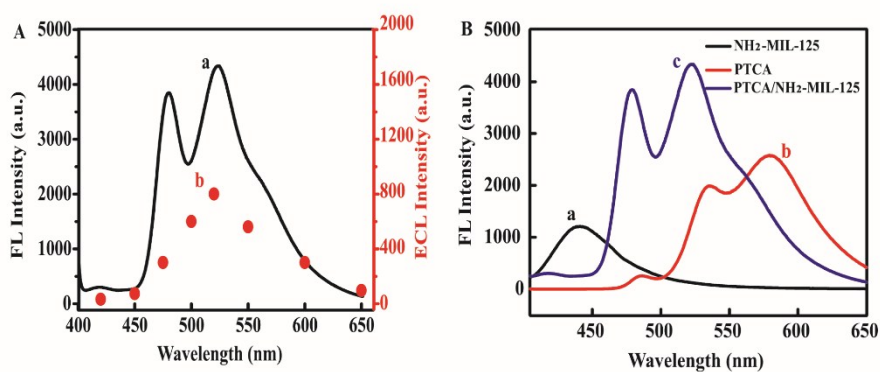

**Figure S3.** (A) (a) Fluorescence spectra and (b) electrochemical luminescence emission spectra of  $\text{NH}_2$ -MIL-125/PTCA; (B) Fluorescence spectra of (a)  $\text{NH}_2$ -MIL-125, (b) PTCA and (c)  $\text{NH}_2$ -MIL-125/PTCA.

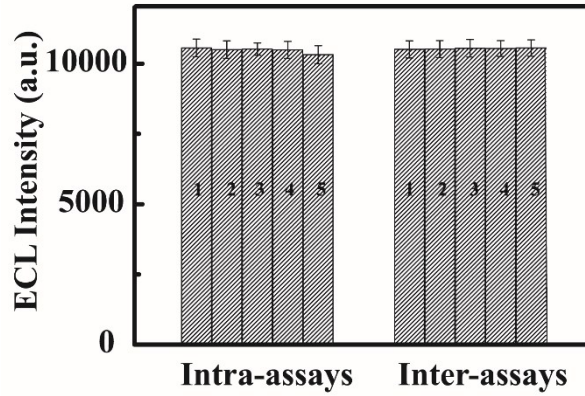

**Figure S4.** Reproducibility of the ECL aptasensor in 0.1nm of DES.

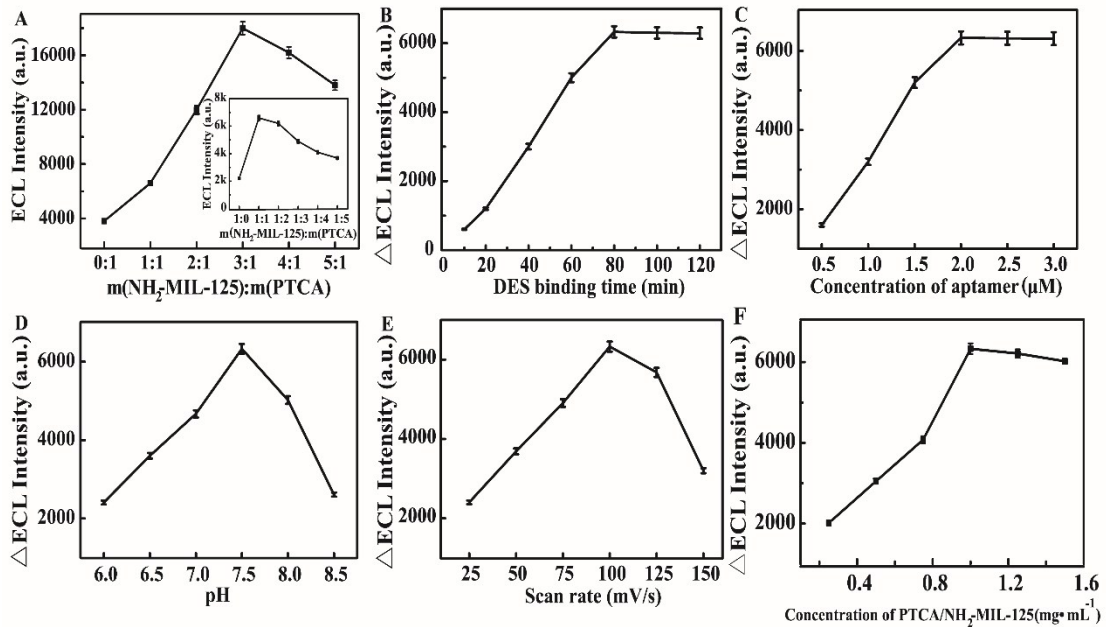

**Figure S5.** Effects of (A) the mass ratio of NH<sub>2</sub>-MIL-125 and PTCA; (B) the reaction time between the amino-aptamer with DES; (C) concentration of aptamer; (D) buffer pH; (E) scan rate on the ECL intensity of the as-fabricated ECL aptasensor; (F) concentration of PTCA/NH<sub>2</sub>-MIL-125;

**Table S1.** Comparison of different analytical methods for DES

| Method                                           | Linear range                                                                   | LOD                                                  | Reference |
|--------------------------------------------------|--------------------------------------------------------------------------------|------------------------------------------------------|-----------|
| MIP                                              | $7.45 \times 10^{-10} \sim 3.73 \times 10^{-6} \text{ M}$                      | $2.2 \times 10^{-11} \text{ M}$                      | 1         |
| DPV                                              | $1.0 \times 10^{-8} \sim 1.3 \times 10^{-5} \text{ M}$                         | $4 \times 10^{-9} \text{ M}$                         | 2         |
| CV                                               | $2.0 \times 10^{-5} \sim 1.0 \times 10^{-7} \text{ M}$                         | $1.5 \times 10^{-8} \text{ M}$                       | 3         |
| Electrochemical immunosensor                     | $1.86 \times 10^{-11} \sim 1.86 \times 10^{-9} \text{ M}$                      | $6.98 \times 10^{-12} \text{ M}$                     | 4         |
| ECL(MMIPs - QDs-Aptamer)                         | $0.3 \sim 1.0 \times 10^5 \text{ pg} \cdot \text{mL}^{-1}$                     | $0.1 \text{ pg} \cdot \text{mL}^{-1}$                | 5         |
| ECL(Ru(bpy) <sub>3</sub> <sup>2+</sup> / UiO-67) | $0.01 \text{ ng} \cdot \text{mL}^{-1} \sim 50 \text{ pg} \cdot \text{mL}^{-1}$ | $3.27 \text{ fg} \cdot \text{mL}^{-1}$               | 6         |
| ECL(CdTe@ZnS/ r-GO)                              | $1.8 \times 10^{-3} \sim 25.0 \text{ nM}$                                      |                                                      | 7         |
| ECL(apt/PTCA/ NH <sub>2</sub> -MIL-125)          | $1.0 \times 10^{-15} \sim 1.0 \times 10^{-6} \text{ M}$                        | $0.25 \text{ pM}$<br>$2.8 \times 10^{-16} \text{ M}$ | This work |

**Table S2.** Application of the ECL aptasensor for DES determination in real samples

| Sample     | Added value<br>fM | Found amount<br>fM | Recovery<br>(%) | RSD<br>(%) (n=3) |
|------------|-------------------|--------------------|-----------------|------------------|
| Tap water  | 0                 | ND                 | -               | -                |
|            | 20.00             | 21.08              | 105.4           | 5.3              |
|            | 50.00             | 48.16              | 96.3            | 3.8              |
|            | 100.00            | 103.32             | 103.3           | 4.0              |
| Lake water | 0                 | ND                 | -               | -                |
|            | 20.00             | 19.22              | 96.1            | 4.0              |
|            | 50.00             | 49.16              | 98.3            | 1.7              |
|            | 100.00            | 104.00             | 104.0           | 3.8              |
| Pond water | 0                 | ND                 | -               | -                |
|            | 20.00             | 19.60              | 98.0            | 4.2              |
|            | 50.00             | 48.22              | 96.4            | 3.6              |
|            | 100.00            | 102.20             | 102.2           | 2.9              |

ND=not founded

### References

1. X. Wang, H. Ding, X. Yu, X. Shi, A. Sun, D. Li and J. Zhao, *Talanta*, 2019, **197**, 98-104.
2. D. Lu, S. Lin, L. Wang, X. Shi, C. Wang and Y. Zhang, *Electrochim. Acta*, 2012, **85**, 131-138.
3. J. Fei, X. Wen, L. Yi, F. Ge, Y. Zhang, M. Huang and X. Chen, *J. Appl. Electrochem.*, 2008, **38**, 1527-1533.
4. P. Xiong, N. Gan, H. Cui, J. Zhou, Y. Cao, F. Hu and T. Li, *Microchim. Acta*, 2014, **181**, 453-462.
5. Q. Jiang, D. Zhang, Y. Cao and N. Gan, *J. Electroanal. Chem.*, 2017, **789**, 1-8.
6. X. Dong, G. Zhao, L. Liu, X. Li, Q. Wei and W. Cao, *Biosens. Bioelectron.*, 2018, **110**, 201-206.
7. W.-R. Zhao, T.-F. Kang, Y.-H. Xu, X. Zhang, H. Liu, A.-J. Ming, L.-P. Lu, S.-Y. Cheng and F. Wei, *Sens. Actuators, B*, 2020, **306**, 127563.
